# Supplementary material for: Reduced graphene oxide-stabilized copper nanocrystals with enhanced catalytic activity and SERS properties
Source: Royal Society of Chemistry journal article supplement (doi:10.1039/c6ra05186c), 2016-01-01
Supplement: c6ra05186c1.pdf [file c6ra05186c1.pdf]

## Reduced Graphene Oxide-Stabilized Copper Nanocrystals with Enhanced Catalytic Activity and SERS Property

Meizhen Guo, Youcheng Zhao, Fengying Zhang, Li Xu, Hongfang Yang,

Xinyu Song<sup>\*</sup>, Yuxiang Bu

*School of Chemistry and Chemical Engineering, Shandong University, Jinan, 250100,*

*P. R. China*

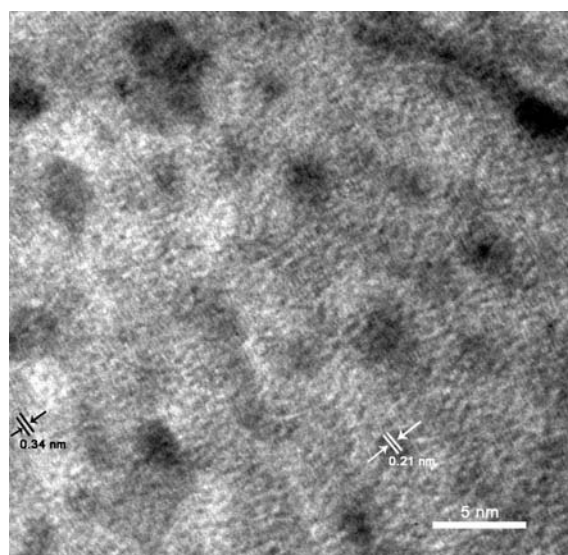

**Fig. S1** HRTEM image of the obtained copper/RGO composite

---

<sup>\*</sup> corresponding author: e-mail: songxy@sdu.edu.cn

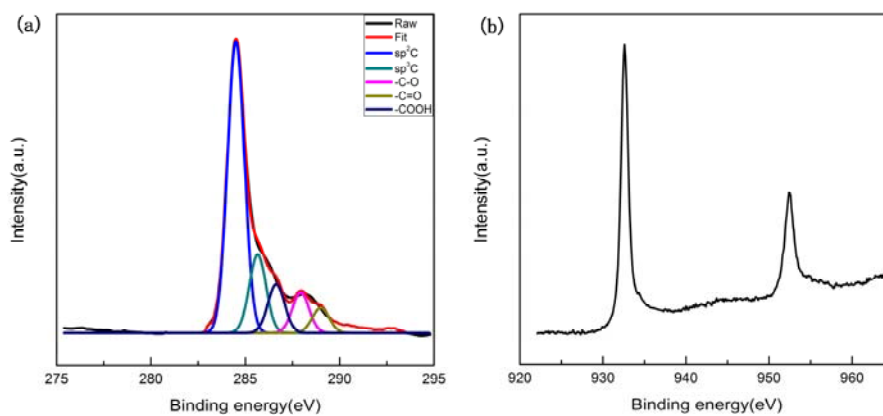

**Fig. S2** The XPS spectra Of Cu/rGO (a) The C1s at 284.55eV, 285.65eV, 286.65eV, 287.95eV, 289.0eV (b) the Cu 2p<sub>3/2</sub> and 2p<sub>1/2</sub> XPS spectra at 932.6eV, 952.5eV

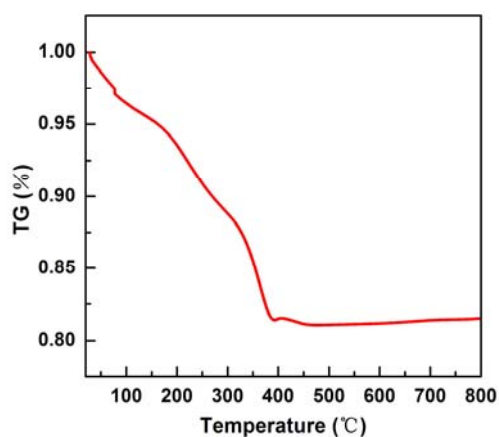

**Fig. S3** TGA curves of Cu/rGO nanocomposite in air.

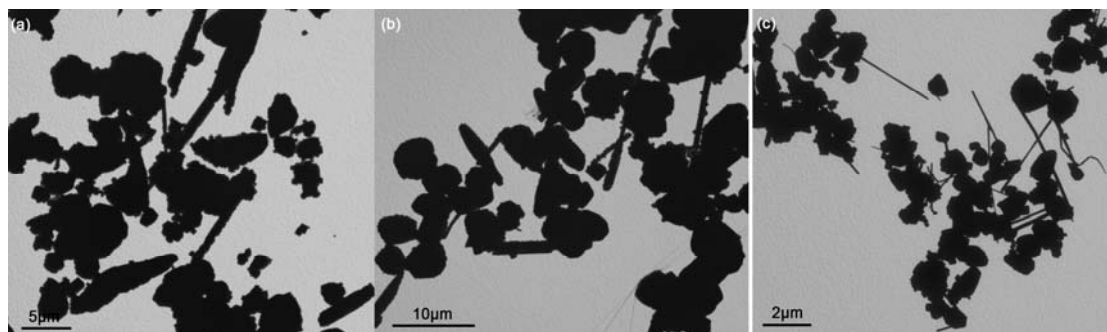

**Fig. S4** TEM images of obtained copper products without GO (a) pH= 6 (b) pH= 8 (c) pH= 12

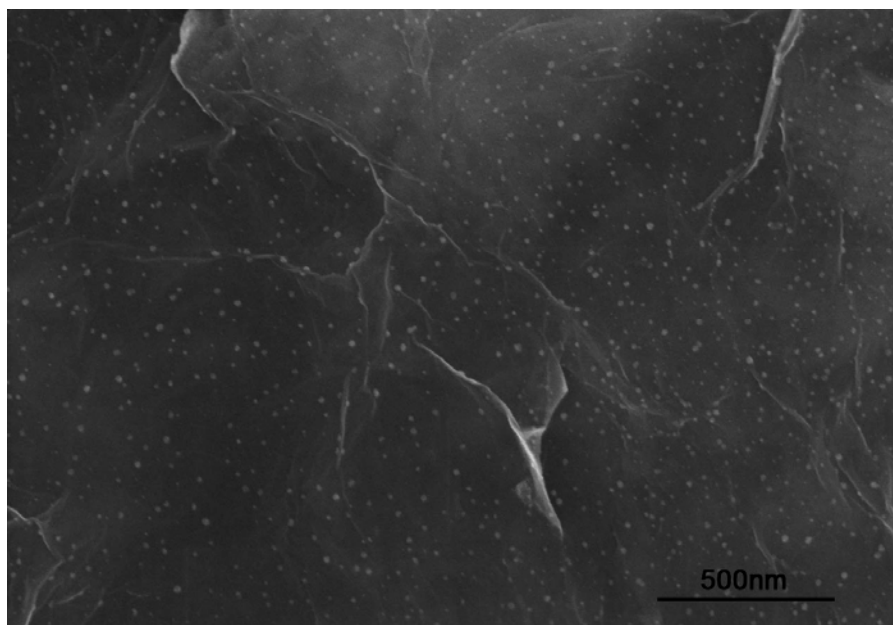

**Fig. S5** SEM image of the obtained Cu/rGO nanocomposites at pH= 10

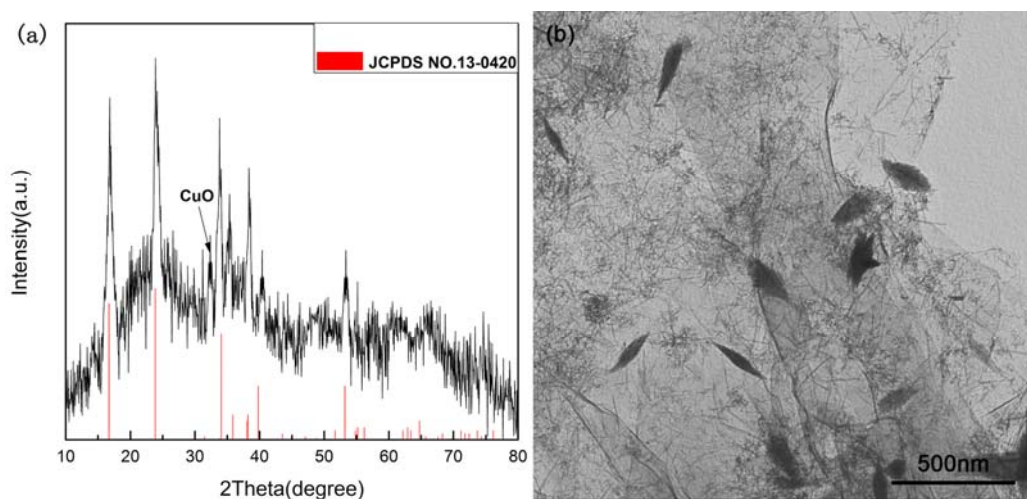

**Fig. S6** The XRD pattern and TEM image of the obtained intermediate product before adding ascorbic acid

Notes: In order to further clarify the synthesis mechanism, the XRD and TEM of the obtained intermediate sample before adding ascorbic acid are given in Fig. S6. As shown in Fig. S6 (a), the characteristic XRD peaks are mainly assigned to orthorhombic  $\text{Cu}(\text{OH})_2$  (JCPDS 80-1268), and a weak pattern peak of monoclinic  $\text{CuO}$  (JCPDS 80-1268) is present. The appearance of the diffraction peak of the copper oxide should be attributed to the transformation from  $\text{Cu}(\text{OH})_2$  to  $\text{CuO}$ . The

corresponding TEM shows that the intermediate products exhibit dispersed nanowire morphology. Moreover,  $\text{Cu}(\text{OH})_2$  is known to spontaneously form 1D nanostructures in water (*Chem. Mater.* **2006**, *18*, 1795). The XRD and TEM results clearly indicates  $\text{Cu}(\text{OH})_2$  intermediates are firstly formed on the rGO in the second step.

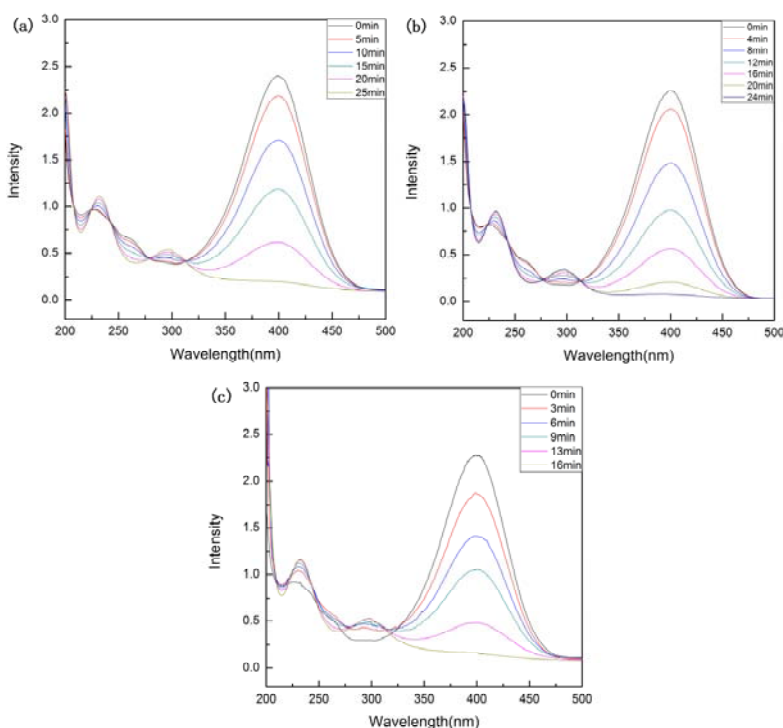

**Fig. S7** Successive UV-Vis spectra of the reduction reaction (a) Cu/rGO pH=6 (b) Cu/rGO pH=8 (c) Cu/rGO pH=12

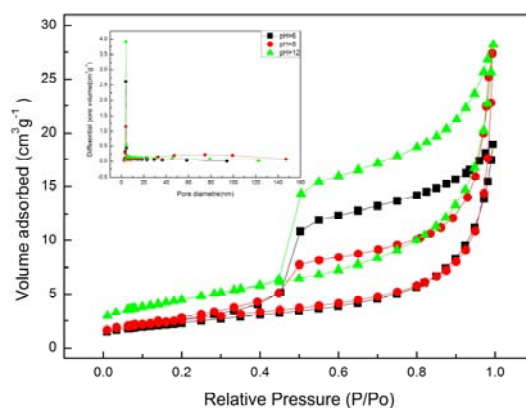

**Fig. S8**  $\text{N}_2$  adsorption-desorption isotherm and corresponding pore-size distribution curves (inset) of the obtained pure Cu/rGO obtained at different pH.

Table S1 The BET surface area, pore volume and average pore size

| Samples        | $S_{\text{BET}}$ ( $\text{m}^2\text{g}^{-1}$ ) | Pore volume ( $\text{cm}^3\text{g}^{-1}$ ) | Pore size (nm) |
|----------------|------------------------------------------------|--------------------------------------------|----------------|
| Cu/rGO (pH=6)  | 28.5                                           | 0.018                                      | 2.528          |
| Cu/rGO (pH=8)  | 30.4                                           | 0.027                                      | 3.866          |
| Cu/rGO (pH=10) | 40.7                                           | 0.045                                      | 4.200          |
| Cu/rGO (pH=12) | 40.1                                           | 0.033                                      | 3.882          |

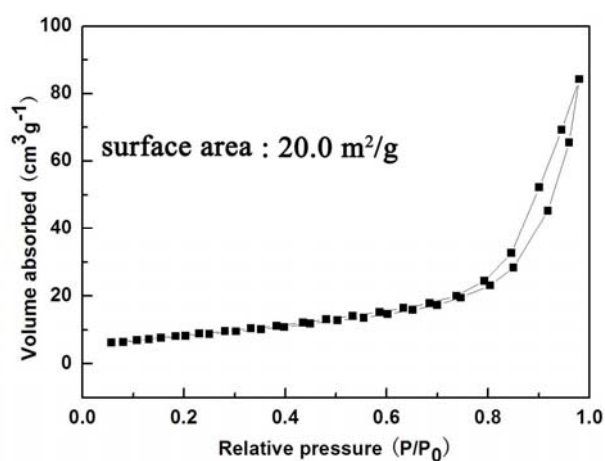

**Fig. S9**  $\text{N}_2$  adsorption–desorption isotherm of the pure Cu nanoparticles.

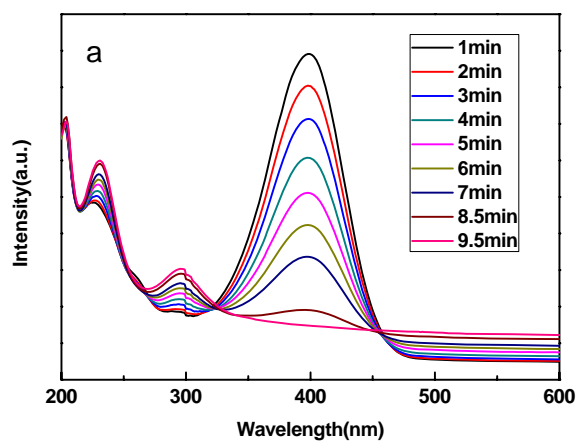

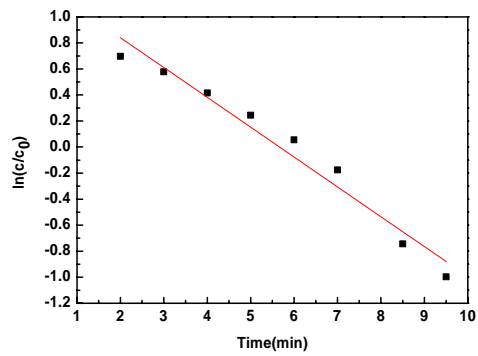

**Fig. S 10** a) Successive UV-vis spectra of reduction reaction. b) Absorbance  $\ln(C/C_0)$  vs. time plot for the reduction of 4-NP with obtained solid catalysts (T 298 K)

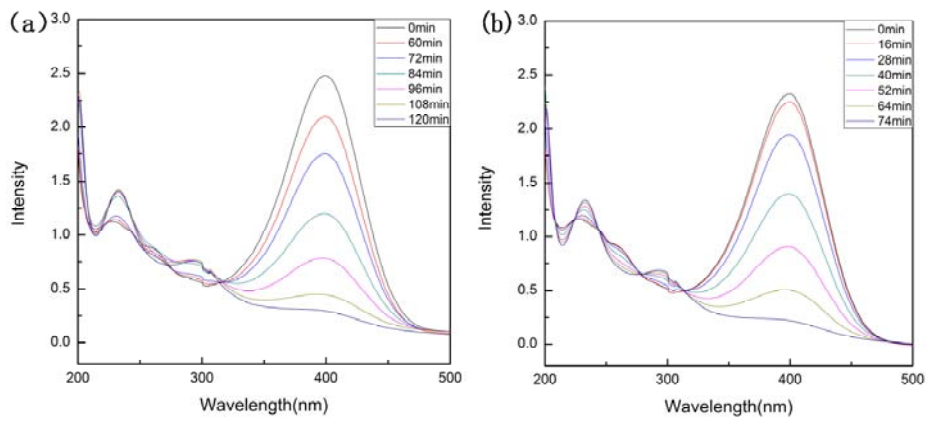

**Fig. S11** Successive UV-Vis spectra of the reduction reaction (a)  $\text{Cu}_2\text{O}/\text{rGO}$  (b)  $\text{CuO}/\text{rGO}$

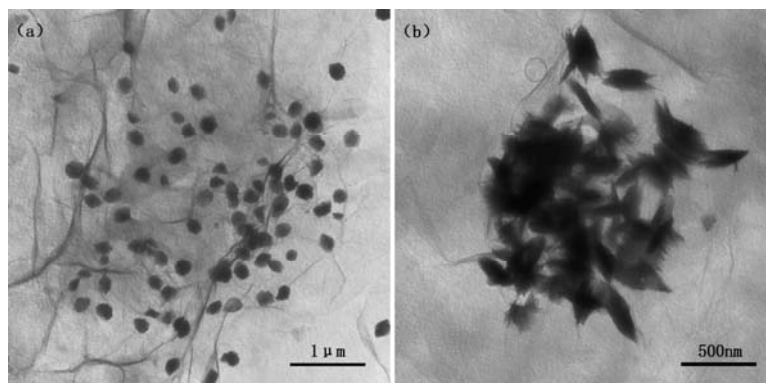

**Fig. S12** TEM images (a)  $\text{Cu}_2\text{O}/\text{rGO}$  (b)  $\text{CuO}/\text{rGO}$
